# Supplementary material for: Correlation between Maspin Levels in Different Biological Samples and Pathologic Features in Colorectal Adenocarcinomas
Source: MDPI journal article supplement (doi:10.3390/life13041060), 2023-04-20
Supplement: s1 [file s1]

## **Supplementary materials**

**Article type:** Original article

### **Correlation between MASPIN levels in different biological samples and pathologic features in colorectal adenocarcinomas**

Alexandru Adrian Bratei<sup>1,2,3,4</sup>, Raluca-Ioana Stefan-van Staden<sup>1,2</sup>

<sup>1</sup> Faculty of Applied Chemistry and Material Sciences, University Politehnica of Bucharest, Bucharest, Romania

<sup>2</sup> Laboratory of Electrochemistry and PATLAB, National Institute of Research for Electrochemistry and Condensed Matter, 060021 Bucharest-6, Romania

<sup>3</sup> Department of Pathology, Emergency University Hospital, Bucharest, Romania

<sup>4</sup> Department of Pathology, University of Medicine and Pharmacy of Tirgu-Mures, 540139 Tirgu Mures, Romania

#### **Corresponding Author:**

Prof. dr. habil. R.I. Stefan-van Staden<sup>1,2</sup>, Laboratory of Electrochemistry and PATLAB, National Institute of Research for Electrochemistry and Condensed Matter, 060021 Bucharest-6, Romania, email: [ralucavanstaden@gmail.com](mailto:ralucavanstaden@gmail.com)

**Table S1.** Determination of the concentration of maspin in tumoral tissue, whole blood, saliva and urine using stochastic sensors.

| Patient nr. | Tumoral tissue |      | Whole blood    |      | Saliva         |      | Urine          |      |
|-------------|----------------|------|----------------|------|----------------|------|----------------|------|
|             | Maspin (pg/mL) | SD   |
| 1           | 145.61         | 0.04 | 119.68         | 0.04 | -              | -    | -              | -    |
| 2           | 252.5          | 0.03 | 201.9          | 0.05 | 347.38         | 0.03 | -              | -    |
| 3           | 296.78         | 0.04 | 191.78         | 0.03 | 56.43          | 0.03 | 978            | 0.03 |
| 4           | 222.46         | 0.03 | 454.9          | 0.02 | 208.22         | 0.05 | 45.27          | 0.03 |
| 5           | 131.47         | 0.05 | 454.63         | 0.04 | 210.12         | 0.02 | 50.87          | 0.02 |
| 6           | 222.45         | 0.05 | 59.08          | 0.02 | 473.88         | 0.04 | 521.46         | 0.04 |
| 7           | 100.11         | 0.02 | 366.35         | 0.04 | 157.63         | 0.03 | 16.83          | 0.02 |
| 8           | 602.02         | 0.03 | 274.3          | 0.03 | 391.65         | 0.02 | 106.3          | 0.02 |
| 9           | 556.1          | 0.04 | 182.36         | 0.04 | 35.24          | 0.04 | -              | -    |
| 10          | 301.86         | 0.03 | 69.08          | 0.03 | 135.11         | 0.02 | 301.01         | 0.04 |
| 11          | 120.65         | 0.08 | 4.56           | 0.06 | 301.84         | 0.06 | 45.69          | 0.03 |
| 12          | 274.49         | 0.07 | 53.14          | 0.02 | 158.89         | 0.03 | 96.53          | 0.04 |
| 13          | 170.3          | 0.03 | 195.6          | 0.04 | 252.5          | 0.02 | 134.51         | 0.01 |
| 14          | 369.47         | 0.03 | 436.87         | 0.03 | 217.08         | 0.04 | -              | -    |
| 15          | 291.59         | 0.07 | 286.65         | 0.02 | 44.41          | 0.03 | 26.38          | 0.04 |
| 16          | 280.58         | 0.02 | 165.84         | 0.02 | 481.47         | 0.03 | 352.18         | 0.03 |
| 17          | 239.25         | 0.03 | 330.93         | 0.04 | 157.63         | 0.04 | -              | -    |
| 18          | -              | -    | 51.68          | 0.03 | 252.5          | 0.03 | 665.25         | 0.05 |
| 19          | 223.75         | 0.04 | 150.91         | 0.05 | 334.73         | 0.03 | 215.19         | 0.03 |
| 20          | 973.14         | 0.02 | 136.41         | 0.03 | -              | -    | 12.6           | 0.04 |
| 21          | 500.98         | 0.03 | 130.87         | 0.02 | -              | -    | 14.87          | 0.03 |
| 22          | 125.06         | 0.07 | 189.25         | 0.03 | -              | -    | 11.61          | 0.04 |
| 23          | 217.99         | 0.04 | 100.7          | 0.04 | 277.8          | 0.05 | 913.1          | 0.04 |
| 24          | 237.32         | 0.02 | 360.72         | 0.05 | 249.34         | 0.02 | -              | -    |
| 25          | 537.08         | 0.03 | 424.67         | 0.03 | -              | -    | -              | -    |
| 26          | 243.74         | 0.04 | 201.9          | 0.03 | -              | -    | 378.27         | 0.04 |
| 27          | 200.89         | 0.03 | 38.59          | 0.02 | 78.69          | 0.04 | 24.96          | 0.03 |
| 28          | 153.2          | 0.04 | 151.3          | 0.05 | -              | -    | 847.56         | 0.04 |
| 29          | 219.88         | 0.03 | 147.76         | 0.04 | 360.66         | 0.03 | 42.73          | 0.04 |
| 30          | 393.14         | 0.03 | 69.08          | 0.05 | -              | -    | -              | -    |

|    |        |      |        |      |   |   |        |      |
|----|--------|------|--------|------|---|---|--------|------|
| 31 | 295.64 | 0.02 | 198.68 | 0.03 | - | - | 606.57 | 0.03 |
|----|--------|------|--------|------|---|---|--------|------|

**Table S2a. Pathological features.**

| Patient nr. | Type                    | Sex    | Age | Exact Location              | Macroscopic features   | Microscopic type         |
|-------------|-------------------------|--------|-----|-----------------------------|------------------------|--------------------------|
| 1           | colorectal cancer       | Male   | 85  | Rectosigmoid colon          | Ulceroinfiltrative     | Adenocarcinoma           |
| 2           | colorectal cancer       | Male   | 72  | Rectum                      | Vegetant               | Adenocarcinoma           |
| 3           | colorectal cancer       | Male   | 69  | Transverse colon            | Ulceroinfiltrative     | Adenocarcinoma           |
| 4           | colorectal cancer       | Male   | 75  | Rectum                      | Ulceroinfiltrative     | Adenocarcinoma           |
| 5           | colorectal cancer       | Male   | 70  | Rectum                      | Vegetant and ulcerated | Adenocarcinoma           |
| 6           | colorectal cancer       | Female | 79  | Rectum                      | Vegetant and ulcerated | Adenocarcinoma           |
| 7           | colorectal cancer       | Female | 57  | Transverse colon            | Ulceroinfiltrative     | Adenocarcinoma           |
| 8           | colorectal cancer       | Male   | 55  | Rectosigmoid colon          | Ulceroinfiltrative     | Adenocarcinoma           |
| 9           | colorectal cancer       | Male   | 83  | Ascending colon             | Vegetant and ulcerated | Adenocarcinoma           |
| 10          | colorectal cancer       | Male   | 67  | Rectum                      | Ulceroinfiltrative     | Adenocarcinoma           |
| 11          | colorectal cancer       | Male   | 70  | Descending colon            | Ulceroinfiltrative     | Adenocarcinoma           |
| 12          | colorectal cancer       | Male   | 72  | Rectosigmoid colon          | Vegetant and ulcerated | Adenocarcinoma           |
| 13          | colorectal cancer       | Female | 73  | Ascending colon             | Vegetant and ulcerated | Adenocarcinoma           |
| 14          | colorectal cancer       | Male   | 81  | Ascending colon             | -                      | Adenocarcinoma           |
| 15          | colorectal cancer       | Male   | 80  | Rectosigmoid colon          | Ulceroinfiltrative     | Adenocarcinoma           |
| 16          | sigmoid cancer          | Female | 47  | Rectum                      | Ulceroinfiltrative     | Adenocarcinoma           |
| 17          | sigmoid cancer          | Male   | 79  | Rectosigmoid and anal canal | Ulceroinfiltrative     | Adenocarcinoma           |
| 18          | Rectosigmoid cancer     | Male   | 45  | Rectosigmoid colon          | Ulceroinfiltrative     | Adenocarcinoma           |
| 19          | sigmoid cancer          | Male   | 63  | Sigmoid colon               | Vegetant               | Adenocarcinoma           |
| 20          | Rectal cancer           | Male   | 75  | Rectum                      | Vegetant               | Adenocarcinoma           |
| 21          | ascending colon cancer  | Male   | 76  | Ascending colon             | Vegetant and ulcerated | Adenocarcinoma           |
| 22          | Rectal cancer           | Female | 63  | Rx Rectum                   | Ulceroinfiltrative     | Adenocarcinoma           |
| 23          | Rectal cancer           | Female | 56  | Rectum                      | -                      | Adenocarcinoma           |
| 24          | sigmoid cancer          | Male   | 78  | Sigmoid colon               | Ulceroinfiltrative     | Adenocarcinoma           |
| 25          | ascending colon cancer  | Female | 72  | Ascending colon             | Ulceroinfiltrative     | Medullary adenocarcinoma |
| 26          | sigmoid cancer          | Male   | 75  | Sigmoid colon               | Ulceroinfiltrative     | Adenocarcinoma           |
| 27          | descending colon cancer | Female | 64  | Descending colon            | Ulceroinfiltrative     | Adenocarcinoma           |
| 28          | sigmoid cancer          | Female | 86  | Sigmoid colon               | Ulceroinfiltrative     | Adenocarcinoma           |

|    |                         |      |    |                  |                     |                          |
|----|-------------------------|------|----|------------------|---------------------|--------------------------|
| 29 | rectal cancer           | Male | 68 | Rectum           | Ultero-infiltrative | Adenocarcinoma           |
| 30 | transverse colon cancer | Male | 70 | Transverse colon | Ultero-infiltrative | Adenocarcinoma           |
| 31 | cecum carcinoma         | Male | 76 | Ascending colon  | Vegetant            | Medullary adenocarcinoma |

**Table S2b. Pathological features.**

| Patient nr. | Adenocarcinoma Grading | Maximum diameter (mm) | Maximum depth (mm) | Mucinous compound | Molecular subtype | Survival | pT | pN | Budding | Stroma               |
|-------------|------------------------|-----------------------|--------------------|-------------------|-------------------|----------|----|----|---------|----------------------|
| 1           | G2                     | 60                    | 22                 | No                | Hybrid            | Dead     | 3  | 0  | 1       | fibrous-inflammatory |
| 2           | G2                     | 40                    | 21                 | No                | Epithelial        | Alive    | 2  | 0  | 0       | -                    |
| 3           | G2                     | 40                    |                    | No                | Hybrid            | Dead     | 4  | 0  | 2       | fibrous-inflammatory |
| 4           | G2                     | 50                    | 25                 | Yes               | Epithelial        | Alive    | 3  | 1  | 2       | fibrous-inflammatory |
| 5           | G2                     | 60                    | 16                 | No                | Hybrid            | Alive    | 3  | 1  | 2       | fibrous-inflammatory |
| 6           | G2                     | 40                    | 25                 | Yes               | Epithelial        | Alive    | 4  | 1  | 3       | fibrous-inflammatory |
| 7           | G2                     | 22                    | 12                 | No                | Hybrid            | Alive    | 3  | 1  | 2       | fibrous-inflammatory |
| 8           | G2                     | 60                    | -                  | No                | Hybrid            | Dead     | 4  | 1  | 2       | fibrous-inflammatory |
| 9           | G2                     | 80                    | -                  | No                | Epithelial        | Alive    | 3  | 0  | 1       | fibrous-inflammatory |
| 10          | G2                     | 70                    | 13                 | No                | Epithelial        | Alive    | 3  | 0  | 1       | fibrous-inflammatory |
| 11          | G2                     | 30                    | 9                  | No                | Epithelial        | Alive    | 3  | 1  | 2       | fibrous-inflammatory |
| 12          | G2                     | 23                    | 10                 | No                | -                 | Alive    | 3  | 0  | 2       | fibrous-inflammatory |
| 13          | G2                     | 40                    | 12                 | Yes               | Epithelial        | Alive    | 4  | 1  | 3       | -                    |
| 14          | G2                     | -                     | -                  | No                | Epithelial        | Alive    | 3  | 2  | 2       | fibrous-inflammatory |
| 15          | G2                     | 45                    | 10                 | No                | Hybrid            | Alive    | 3  | 0  | 1       | fibrous-inflammatory |
| 16          | G2                     | 30                    | 12                 | Yes               | Hybrid            | Alive    | 3  | 2  | 1       | -                    |
| 17          | G2                     | 40                    | 12                 | No                | Hybrid            | Alive    | 4  | 1  | 1       | inflammatory         |
| 18          | G2                     | 30                    | 7                  | No                | Epithelial        | Alive    | 4  | 0  | 2       | fibrous-inflammatory |
| 19          | G2                     | 60                    | 20                 | Yes               | Hybrid            | Alive    | 4  | 1  | 3       | inflammatory         |
| 20          | G2                     | 38                    | -                  | No                | Mesenchymal       | Alive    | 3  | 0  | 3       | fibrous-inflammatory |
| 21          | G2                     | 65                    | 13                 | Yes               | Hybrid            | Alive    | 3  | 0  | 3       | fibrous-inflammatory |
| 22          | G2                     | 20                    | -                  | No                | Epithelial        | Alive    | 2  | 0  | -       | -                    |
| 23          | G3                     | 30                    | 12                 | No                | Hybrid            | Alive    | 4  | 0  | -       | fibrous-inflammatory |
| 24          | G2                     | 30                    | 13                 | Yes               | Epithelial        | Alive    | 4  | 0  | -       | -                    |
| 25          | G1                     | 65                    | 15                 | No                | Epithelial        | Alive    | 2  | 0  | 1       | -                    |
| 26          | G2                     | 30                    | -                  | No                | Epithelial        | Alive    | 4  | 1  | 3       | fibrous-inflammatory |

|    |    |    |    |    |            |       |   |   |   |                      |
|----|----|----|----|----|------------|-------|---|---|---|----------------------|
| 27 | G2 | 30 | 15 | No | -          | Alive | 4 | 2 | 3 | fibrous-inflammatory |
| 28 | G2 | 50 | 30 | No | -          | Alive | 4 | 0 | 2 | -                    |
| 29 | G2 | 20 | 15 | No | -          | Dead  | 4 | 1 | 2 | -                    |
| 30 | G2 | 45 | 17 | No | Epithelial | Alive | 4 | 1 | 3 | -                    |
| 31 | G1 | 95 | 77 | No | Epithelial | Alive | 4 | 0 | 0 | fibrous-inflammatory |
